# Supplementary material for: Evolution of Shh endoderm enhancers during morphological transition from ventral lungs to dorsal gas bladder
Source: PubMed Central journal article supplement (PMC5296767; doi:10.1038/ncomms14300), 2017-02-03
Supplement: ncomms14300-s1.pdf [file ncomms14300-s1.pdf]

## Supplementary Figure 1

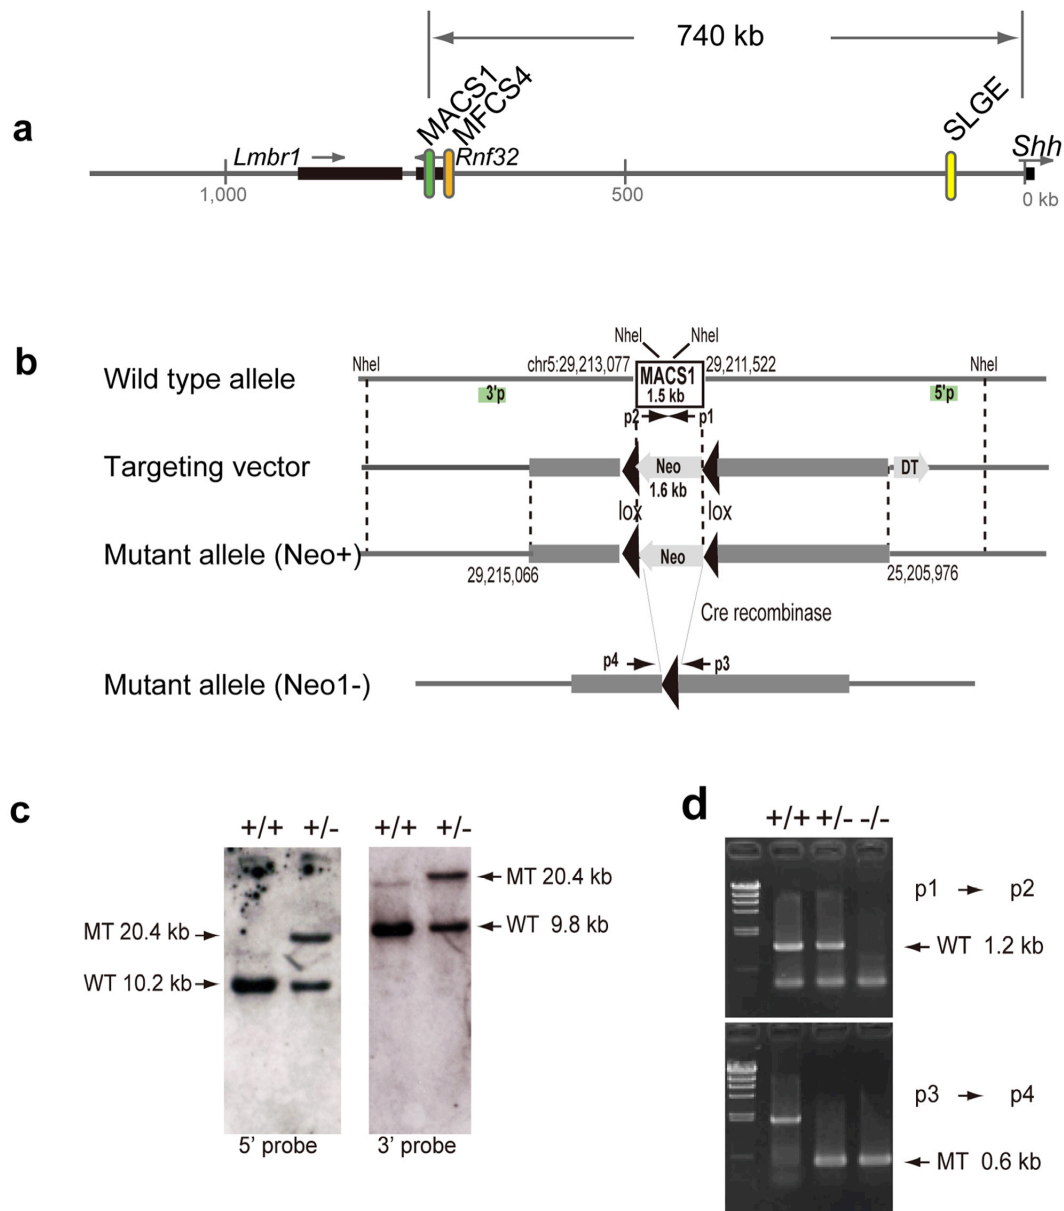

**Supplementary Fig. 1. Generation of the MACS1 knockout mouse.** Genomic location of three endoderm enhancers in the *Shh* regulatory region (a). Coloured bars mark MACS1 (green), MFCS4 (orange) and SLGE (yellow). MACS1 is localized at the 740 kb upstream of the *Shh* TSS (0 kb) in the mouse genome. Schematic diagram of ES cell targeting of MACS1 (b). Southern blot

analysis of the mutant ES cell clone (c). Southern blot analysis was carried out for NheI-digested genomic DNAs. A 5' probe (5'p in (b)) detected bands of 10.2 kb for the wild type allele (WT) and 20.4 kb for the mutant allele (MT). A 3' probe (3'p in (b)) detected bands of 9.8 kb for WT and 20.4 kb for MT. PCR primer pairs p1-p2 and p3-p4 in (b) (Supplementary Table 3) were used to detect 1.2 kb WT and 660 bp MT amplification products, respectively (d).

## Supplementary Figure 2

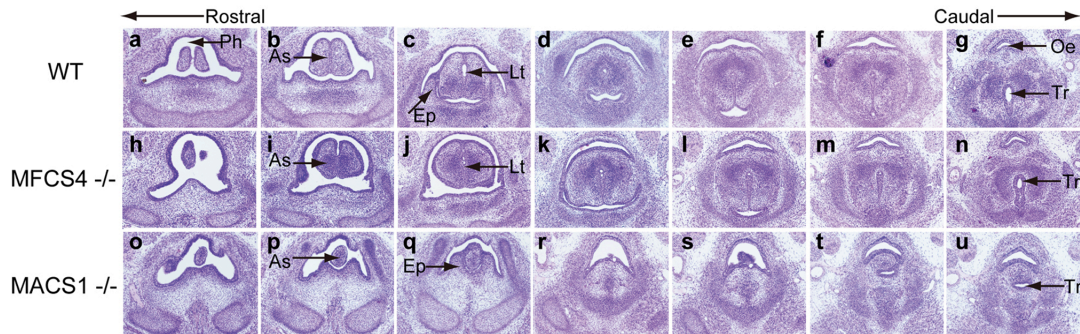

**Supplementary Fig. 2. Defects of the respiratory organs in MFCS4<sup>-/-</sup> and MACS1<sup>-/-</sup> embryos.** Serial transverse sections of wild type (a-g), MFCS4<sup>-/-</sup> (h-n) and MACS1<sup>-/-</sup> (o-u) embryos at E13.5. In MFCS4<sup>-/-</sup> embryos, the epiglottis is truncated (i, j), but the arytenoid swelling is bifurcated (h, i) and the laryngotracheal groove is well formed (j-l). In MACS1<sup>-/-</sup> embryos, the epiglottis is recognizable (p, q), but the arytenoid swelling is hypoplastic and not bifurcated (o-q). Consequently, the laryngotracheal groove is not formed (q-s) in the MACS1<sup>-/-</sup> embryos. The septum between oesophagus and larynx is deficient (t) but the trachea is formed (u). As, arytenoid swelling; Ep, epiglottis; Oe, Oesophagus; Lt, laryngotracheal groove; Ph, pharynx; Tr, trachea.

Supplementary Figure 3

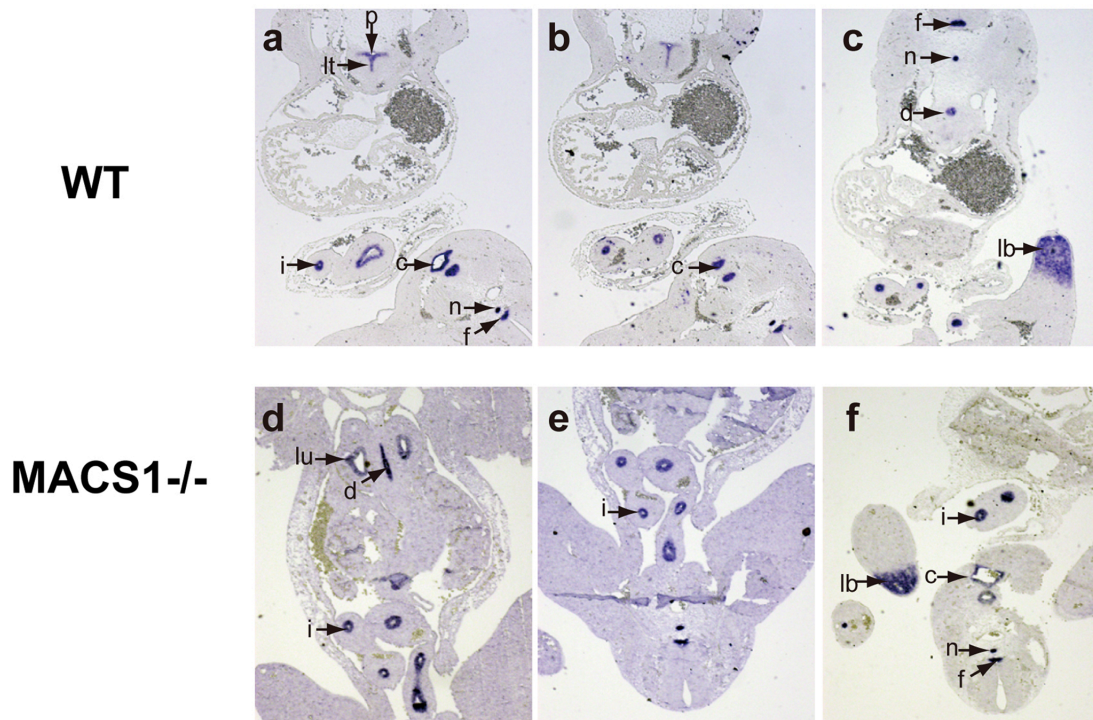

**Supplementary Fig. 3. *Shh* expression in the lung and gut of *MACS1*<sup>-/-</sup> embryos.** Serial sections of wild type (a-c) and *MACS1*<sup>-/-</sup> (d-f) embryos at E11.5. *Shh* expression is normally detected in the epithelia of lung, gut and urogenital tract of *MACS1*<sup>-/-</sup> embryos. c, cloaca; d, digestive tube; f, floor plate; i, intestine; lb, limb bud; lt, laryngotracheal groove; lu, lung bud; n, notochord; p, pharynx.

#### Supplementary Figure 4

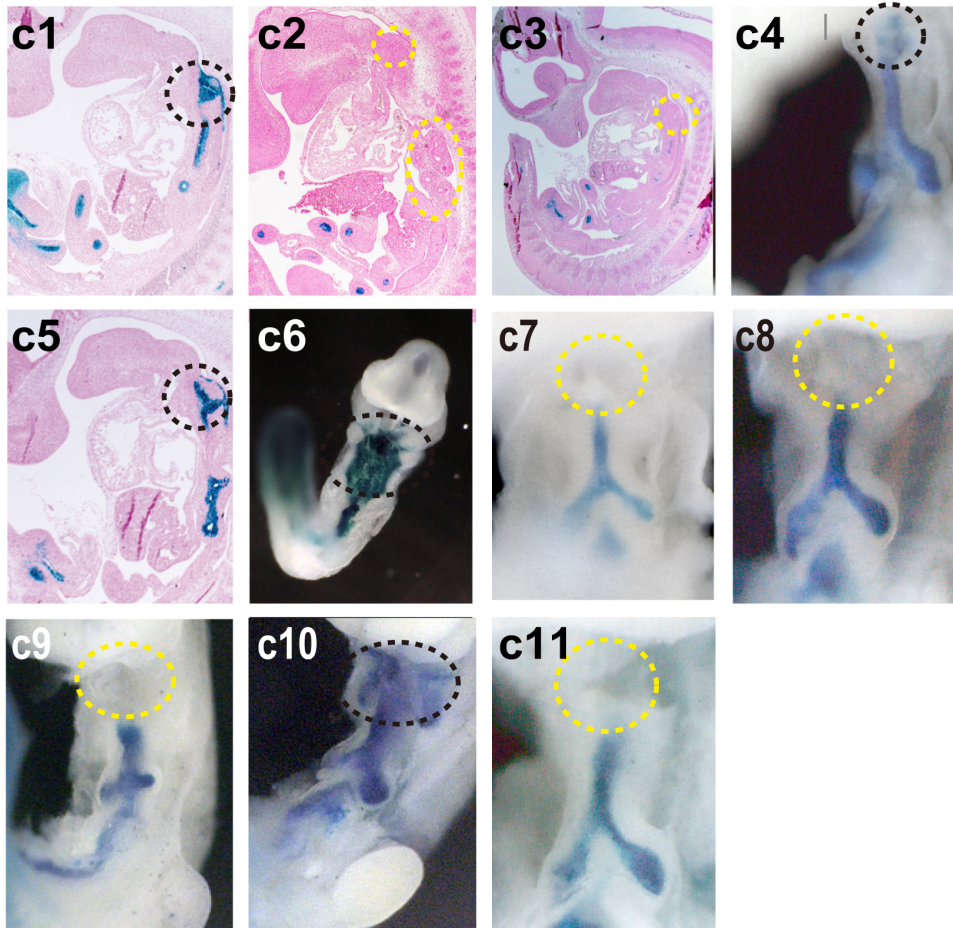

**Supplementary Fig. 4. *LacZ* reporter expression driven by serial deletion constructs.** The label of each image matches that of the corresponding construct in Fig. 3. Fully active constructs (Fig. 3a) can drive *LacZ* reporter expression in the epithelia of larynx, lung and gut from hind stomach to urogenital tract (c1, c4 to c5, c-10). Dashed black lines enclose *LacZ* reporter expression in the laryngeal epithelium, while dashed yellow lines denote abrogation of *LacZ* expression in the laryngeal epithelium.

Supplementary Figure 5

|                | <u>HNF4-Q6</u>                                               | <u>CMAF</u> |
|----------------|--------------------------------------------------------------|-------------|
|                | <u>HNF4-DR1</u>                                              | <u>CDP</u>  |
| Mouse          | TAGGTGAACCTCTGCTGCTC-A-GG---- <td></td>                      |             |
| Rat            | TAGGTGAATTCGTCTGCTC-A-GG----AAAGTCTT--AAGTGATCCATCTC-ATGT    |             |
| Cow            | CAGGTGAACCTCTGCTGCCC-A-GG----GGCCCTCTGAGC-ATCCATCTTGATGT     |             |
| Sheep          | CAGGTGAACCTCTGCTGCCC-A-GG----GGCCCTCTGAGC-ATCCATCTTGATGT     |             |
| Horse          | CAGGTGAACCTCTGCTGCCC-A-GG----AGGCCTCTCCAAGTGATCCATCTTGATGT   |             |
| Human          | CAGGTGAACCTCTGCTACTC-A-GG----AGGGCTTTTTAAGTGATCCATCTTGATGT   |             |
| Opossum        | CAGGTGAACCTTGTCTAGCA-A-GG----AGACCTTTTAAAGTGATCCATCTTGATGT   |             |
| Platypus       | CAGGTGAACCTTGTCCACCA-GTGG----AGGCCTTCTAAGTGATCTATCTTTGTGT    |             |
| Chicken        | GGCGTGAACCTTGTCCAC---AGGG----AAGCCTTTTAAAGTGATCCA-----GTGT   |             |
| Turkey         | GGCATGAACCTTGTCCAC---AGGG----AAGCCTTTTAAAGTGATCCA-----GTGT   |             |
| Alligator      | TTGGTGAACCTTGNCCAT---AGGG----AAGTCTT-TTGAGTGATCCATCTTAATGT   |             |
| Turtle         | TTAGTGAACCTCTGT--AC---AGAG----AAGCCTTCTTAAAGTGATCCATCTTAATGT |             |
| Lizard         | GAGATGAACCTTGCCTGCCA-AAGGCA--AGCCCTTTTAAAGCAATCTATCTTTATGT   |             |
| Xenopus        | --GGTGAACCTTGTGCACTT-TGGGGAGTAGTTCCTTTGCAAGTAATCCATCTTAATGT  |             |
| Coelacanth     | CAGGTGAACCTTGTCCACC--ACAG--GGTGACTTTTCAAGTGATCCATCTAAATGT    |             |
| Spotted gar    | CAGGTGCACCTTGTCTATCTTACAG---GAGGCCTTTCAAAGCAATCCATCTTGGTGT   |             |
| Skate          | TTGGTGGACATCTGCTCATT-----TTAGAAAACCTTTTCAATTTAAATGC          |             |
| Elephant shark | TTAGTGGACTTGCACC-----CCTGAAAACCTTTTCAATTTAAATGC              |             |

\* \* \* \* \*

|                | <u>CMAF</u>                                                  | <u>AP1</u> | <u>HSF</u>    |
|----------------|--------------------------------------------------------------|------------|---------------|
|                | <u>HMG1Y</u>                                                 | <u>Fox</u> | <u>BARBIE</u> |
| Mouse          | C-AGCAAAATTGCTTACTAATGTGTTGACTTAGGGCCAC-CCTCAAAAGCAAAATGAAA  |            |               |
| Rat            | C-AGCAAAATTGCTTACTAATGTGTTGACTTAGGGCCAC-TCTCAAAAGCAAAAGAAA   |            |               |
| Cow            | C-AGCAA--TTGCTTACTAATGTGTTGACTTACGGCTGC-CCTCAAAAGCAAAAGCGAAA |            |               |
| Sheep          | C-AGCAA--TTGCTTACTAATGTGTTGACTTACGGCCGC-CCTCAAAAGCAAAAGTAAA  |            |               |
| Horse          | C-AGCAAAATTGCTTACTAATGTGTTGACTTATGGCCAC-CCTCAAAAGCAAAATGAAA  |            |               |
| Human          | C-AGCAAAATTGCTTACTAATGTGTTGACTTATGGCCGC-CCTCAAAAGCAAAATGAAA  |            |               |
| Opossum        | C-AGCAAAATTGCTTACTAATGTGTTGACTTATGGAAAC-TCTCTAAAGCAAAATGAAA  |            |               |
| Platypus       | C-AGCAAAATTGCTTACTAATGTGTTGACTTATGGGAAC-CCTCAAAAGCAAAATGAAA  |            |               |
| Chicken        | C-AGCAAAATTGCTTACTAATGTGTTGACTTATGGCAAC-CCTCAAAAGTAAAATGAAA  |            |               |
| Turkey         | C-AGCAAAATTGCTTACTAATGTGTTGACTTATGGCAAC-CCTCAAAAGTAAAATGAAA  |            |               |
| Alligator      | C-AGCAAAATTGCTTACTAATGTGTTGACTTACGGCAAC-CCTCAAAAGTAAAATGAAA  |            |               |
| Turtle         | C-AGTAAATTGTTTACTAATGTGTTGACTTATGGCAAC-CCTCAAAAGGAAAATGAAA   |            |               |
| Lizard         | C-AGCAAAATTGCTTACTAATGTGTTGACTTA-----AAAGTAAAATGAAA          |            |               |
| Xenopus        | C-AGCAAAATTGCTTACTAATGTGTTGACTTATGGCAAT-CCTCAAAAGCAAAATGGAA  |            |               |
| Coelacanth     | C-AGCAAAATTGCTTACTAATGTGTTGACTTATGGCAAG-CCTCAAAAGTAAAATGAAA  |            |               |
| Spotted gar    | C-AGCAAAATTGCTTACTAATGTGTTGACTTATGGTAGGACCTTAAAAGTAAAATGAAA  |            |               |
| Skate          | CCAACAATTGGTTACTAATGTGTTGACCTCCAGTACG-CCTCACAACTAACCTTAAA    |            |               |
| Elephant shark | C-AGCAAAATTGCTTACTAATGTGTTGACTTATGGTAA-GCCTCAAAACTAACTGAAA   |            |               |

\* \* \*\* \*\*\* \*\*\*\*\* \* \* \* \* \*

29 bp

|                | <u>HSF</u>                              |
|----------------|-----------------------------------------|
|                | <u>OCT1</u>                             |
|                | <u>PAX5</u>                             |
| Mouse          | A--GCC-TGGAATTTATAGCATCTCAATGCATCAGCTG  |
| Rat            | A--GCC-TGGAATTTATAGCATCTCAATGCATCAGCTG  |
| Cow            | C--GCC-TGGAATTTACAGCGTATCAGTGAATCCGTTG  |
| Sheep          | C--GCC-TGGAATTTACAGCGTATCAATGAATCCGTTG  |
| Horse          | A--GCT-TGGAATTTACAGCATATCAATGAATCAGTTG  |
| Human          | A--GCC-TGGAATTTACAGCATATCAATGAATCAGTTG  |
| Opossum        | A--GGC-TGGAATTTACAGCATATCAATGAATCAGTTG  |
| Platypus       | A--GGT-TGGAATTTACAGCATATCAATGAATCAGTTG  |
| Chicken        | A--GGC-TGGAATTTACAGCATATCAATGAATCAGTTG  |
| Turkey         | A--GGC-TGGAATTTACAGCATATCAATGAATCAGTTG  |
| Alligator      | A--GGC-TGGAATTTACAGCATATCAATGAATCAGTTG  |
| Turtle         | A--GGC-TAGAGTTTACAGCATATCAATGAATCAGTTG  |
| Lizard         | A--GGC-TGGAATTTACAGCGTATCAATGAATCAGTTG  |
| Xenopus        | G--GGCCTGGAATTTACAGCAGATCTATGAATCCGCG-G |
| Coelacanth     | A--GGACTGGAATTTACAGCATATCAATGAATCAGTTG  |
| Spotted gar    | A--GGCTTGGTATTTACTGCAATATCAAGGAATCAGTTG |
| Skate          | ATAACAAGGAATTTACAACGATCAATGAA-----G     |
| Elephant shark | ---AGCAGGGAATTTACAACATATCTATGTA-----G   |

\* \*\*\*\* \* \* \* \* \*

**Supplementary Fig. 5. Sequence comparison and prediction of transcription factor binding motifs in the MACS1 sequence.** ClustalW and rVISTA analyses of a 140-bp sequence in mouse MACS1 (chr5: 29,212,687-29,212,597) that includes the 29-bp sequence (boxed) that is critical for laryngeal expression. We retrieved the genomic sequences from the UCSC and Ensembl genome browsers, and aligned the syntenic region of the 18 vertebrates using the ClustalW system (<http://clustalw.ddbj.nig.ac.jp/>). The rVISTA program (<http://rvista.dcode.org>) predicted a Fox binding motif in the 29-bp critical region. Perfectly conserved nucleotides are indicated by asterisk below the aligned sequences.

## Supplementary Figure 6

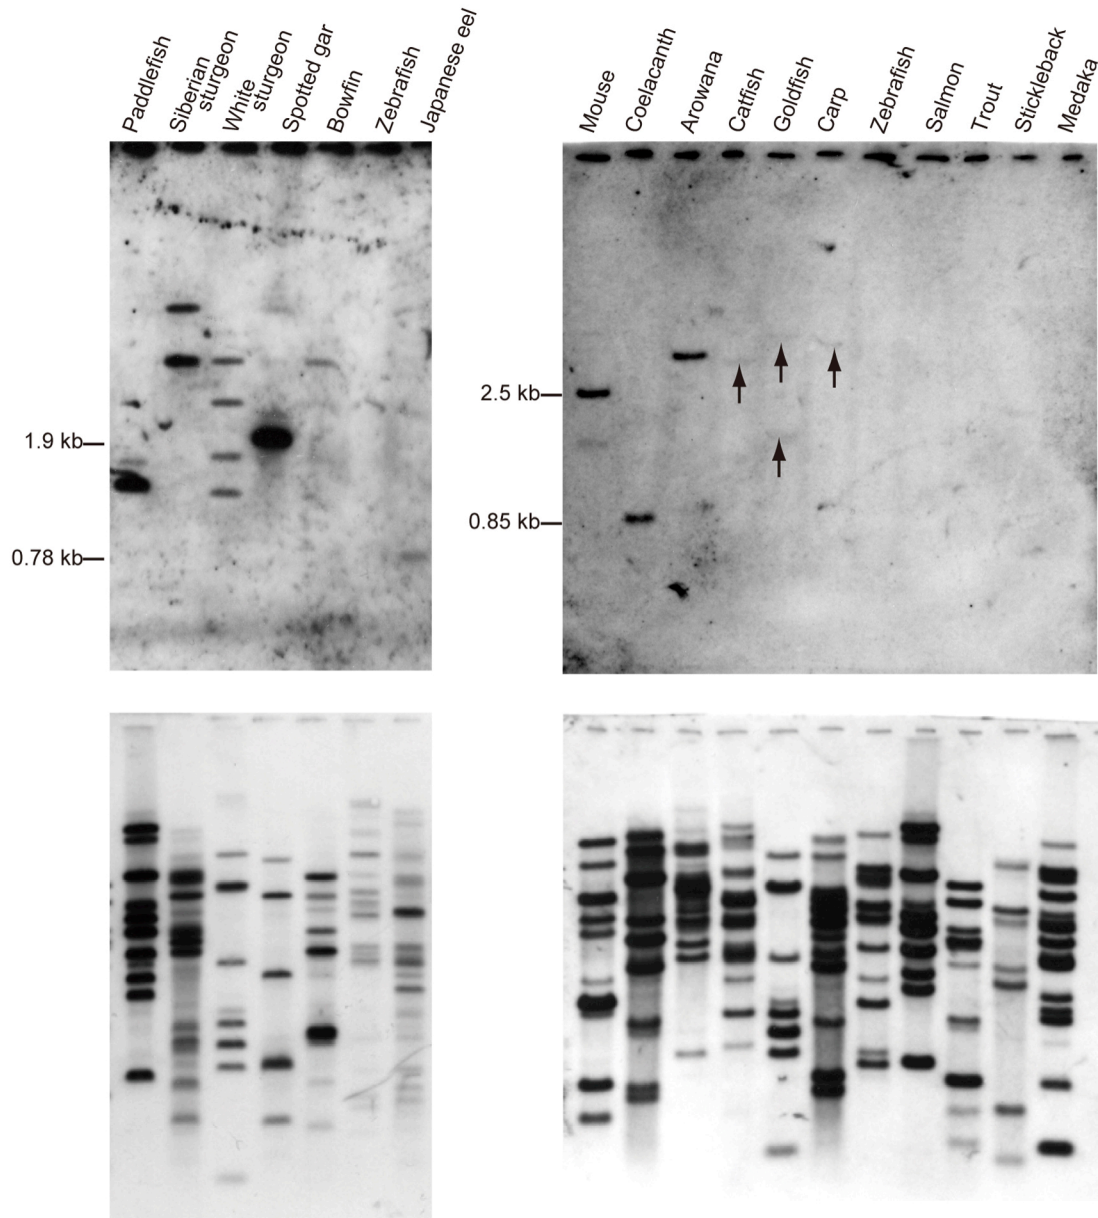

**Supplementary Fig. 6. Southern blot analysis of MACS1 conservation.** A spotted gar MACS1 probe was hybridized with the genomic DNAs (upper images). Genomic DNAs of mouse, a lobe-finned fish (coelacanth), five basal ray-finned fish (paddlefish, Siberian sturgeon, white sturgeon, spotted gar and bowfin) and two teleost fish (Japanese eel and arowana) yielded clear bands. Among teleost fish, catfish, goldfish and carp yielded very faint bands (black arrows). By contrast, zebrafish and euteleost fish (salmon, trout, stickleback and



medaka) did not yield any band. A mouse actin probe was used to examine the condition of the genomic DNAs (lower images).

## Supplementary Figure 7

**a**

|             |                                                               |             |
|-------------|---------------------------------------------------------------|-------------|
| Medaka      | GTTATCTCACAGCAATCCATCTCCATGTCGGTA-CCGTCTCCCTAATGTGTTGACTCAG   | 59          |
| Salmon      | GTTGTCTCACCTCAATCCATCTTGATGTCAGCAGTTATCCTCCTTAATGTGTTGACTTAG  | 60          |
| Spotted gar | GGCCTTCAAAGCAATCCATCTTGGTGTGTCAGCAAAT-TGCTTACTAATGTGTTGACTTAT | 59          |
|             | * * *** ***** ***** * * * * ***** *                           |             |
| Medaka      | GGTTGGACCTTCAAAAAG                                            | 76          |
| Salmon      | GGTCGGACCTCAAAAAG                                             | 77          |
| Spotted gar | GGTAGGACCTT-AAAAG                                             | 75          |
|             | *** ***** *****                                               | 51/77 (66%) |

**b**

|             |                                                               |             |
|-------------|---------------------------------------------------------------|-------------|
| Spotted gar | GGCCTTCAAAGCAATCCATCTTGGTGTGTCAGCAAAT-TGCTTACTAATGTGTTGACTTAT | 59          |
| Salmon      | GTTGTCTCACCTCAATCCATCTTGATGTCAGCAGTTATCCTCCTTAATGTGTTGACTTAG  | 60          |
|             | * * *** ***** ***** * * * * ***** *                           |             |
| Spotted gar | GGTAGGACCTT-AAAAG                                             | 75          |
| Salmon      | GGTCGGACCTCAAAAAG                                             | 77          |
|             | *** ***** *****                                               | 58/77 (75%) |

**c**

|        |                                                              |             |
|--------|--------------------------------------------------------------|-------------|
| Medaka | GTTATCTCACAGCAATCCATCTCCATGTCGGTA-CCGTCTCCCTAATGTGTTGACTCAG  | 59          |
| Salmon | GTTGTCTCACCTCAATCCATCTTGATGTCAGCAGTTATCCTCCTTAATGTGTTGACTTAG | 60          |
|        | *** ***** ***** ***** * * * * ***** ***** *                  |             |
| Medaka | GGTTGGACCTTCAAAAAG                                           | 76          |
| Salmon | GGTCGGACCTCAAAAAG                                            | 77          |
|        | *** ***** *****                                              | 60/77 (78%) |

**Supplementary Fig. 7. Sequence similarity of Block-1 between medaka and salmon or between salmon and spotted gar.** The overall conservation of Block-1 among the three species is relatively low (a). Higher similarity is evident between spotted gar and salmon (b) and between medaka and salmon (c).

## Supplementary Figure 8

**a**

```

Medaka_core1      GCTGTTGTGTTGAC--CACAAATGTCCAGACTGTTTAAACTTAAACACAAATCTTTTGTCC 58
Salmon            GCTTTTGTGTTGACCCCTGGAATGTCCAGACTGTTTGA-CCAAAACACACACTCTCCGTA- 58
Spotted gar      -TCTGTGTTTGTGAC--TGGAATGTATAAGTTACTTGA-CTAGAACACACATTTCT--TA- 53
                  ***  *****          ***** * * * * * * * * * * * * * * * * * *

```

  

```

Medaka_core-1    ACAATAGTGGACAAACAGTGTATGATTCACAAAGCATCAAAGGTGCTCGACA 110
Salmon           --ATTAGTTTACAAACAGTGTATGATTCACATGGCATCAAAGGCCCTCTGAA 108  59/108 (55%)
Spotted gar      --ATTAGTTTACCAACAGTTTATGGTTCACACGGCATCAAAG-CCCTGTGGA 102
                  * **** * * ***** * * * * * * * * * * * * * * * * * *

```

**b**

```

Medaka_core-1    GCTGTTGTGTTGACCAC--AATGTCCAGACTGTTTAAACTTAAACACAAATCTTTTGTCC 58
Salmon           GCTTTTGTGTTGACCCCTGGAATGTCCAGACTGTTTGA-CCAAAACACACACTCTCCGTA- 58
                  ***  *****          ***** * * * * * * * * * * * * * * * * * *

```

  

```

Medaka_core-1    ACAATAGTGGACAAACAGTGTATGATTCACAAAGCATCAAAGGTGCTCGACA 110  79/108 (73%)
Salmon           --ATTAGTTTACAAACAGTGTATGATTCACATGGCATCAAAGGCCCTCTGAA 108
                  * **** ***** * * * * * * * * * * * * * * * * * *

```

**c**

```

Salmon           GCTTTTGTGTTGACCCCTGGAATGTCCAGACTGTTTGAACAAAACACACACTCTCCGTAAT 60
Spotted gar      -TCTGTGTTTGTGAC--TGGAATGTATAAGTTACTTGAACAAAACACACATTTCT--TAAT 55
                  * ** * * * * * * * * * * * * * * * * * * * * * * * * * * * *

```

  

```

Salmon           TAGTTTACAAACAGTGTATGATTCACATGGCATCAAAGGCCCTCTGAA 108  79/108 (73%)
Spotted gar      TAGTTTACCAACAGTTTATGGTTCACACGGCATCAAAG-CCCTGTGGA 102
                  ***** ***** * * * * * * * * * * * * * * * * * *

```

**Supplementary Fig. 8. Sequence similarity of core-1 in Block-2 between medaka and salmon or between salmon and spotted gar.** The overall conservation of core-1 among medaka, salmon and spotted gar is relatively low (a). Higher similarity is evident between medaka and salmon (b) and between salmon and spotted gar (c).

## Supplementary Figure 9

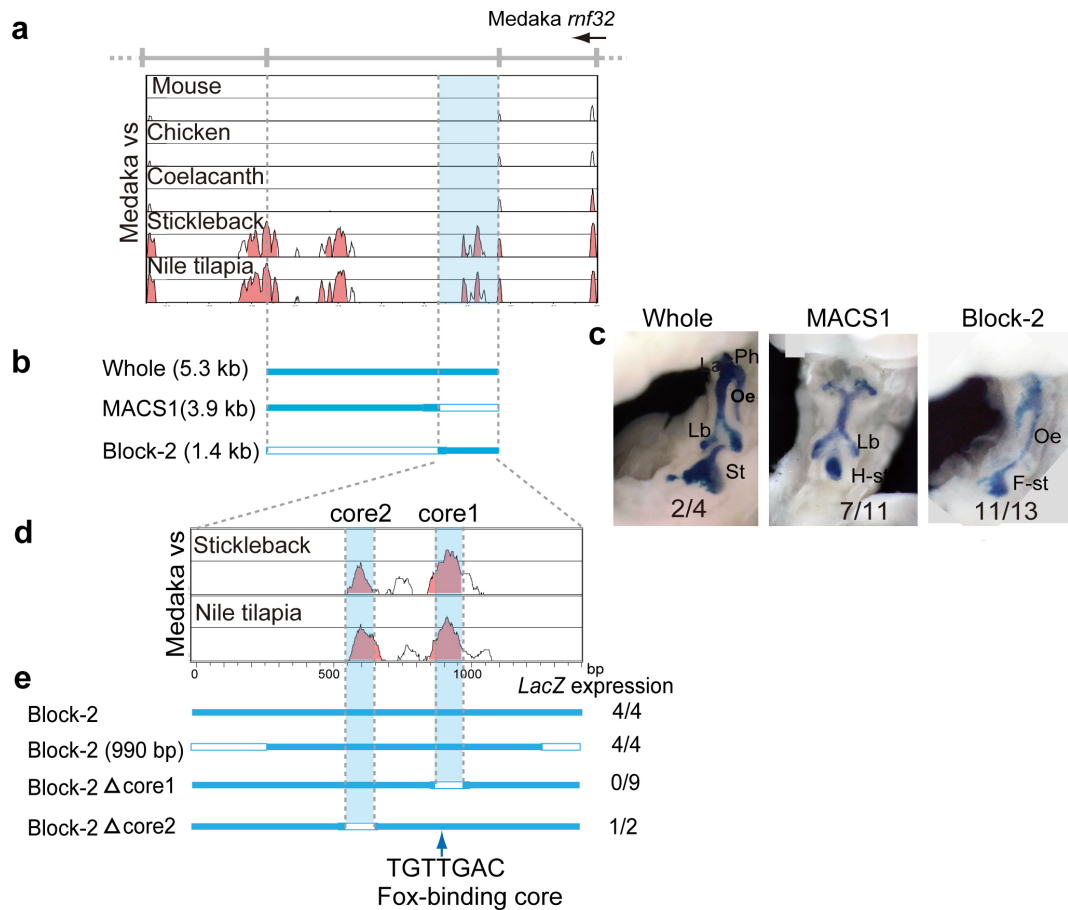

**Supplementary Fig. 9. Transgenic reporter assay of the medaka enhancers in mouse embryos.** VISTA plots of the partial sequence of *mf32* in six vertebrate species (a). The medaka *mf32* intronic sequence was used as the reference genome. A 5.3 kb medaka sequence (named Whole) has two conserved sequence blocks, Block1 (3.9 kb) and Block-2 (1.4 kb). The Whole fragment drove reporter expression in the epithelia of the oesophagus, forestomach and lung buds (c, left). Block-1 drove reporter expression in the epithelia of lung buds and hindstomach (c, middle). Block-2 drove expression in the epithelia of oesophagus and forestomach (c, right). Block-2 contains two euteleost-specific conserved core sequences, core1 and core2 (d, e). Transgenic reporter assay with deletion constructs showed that 990 bp in Block-2 is sufficient for enhancer activity (e). Deletion of core1 abrogated enhancer activity of Block-2 (e). On the other hand, loss of core2 did not affect

the enhancer activity of Block-2 (e). Oe, oesophagus; F-st, forestomach; H-st, hindstomach; La, larynx; Lb, lung bud; Ph, pharynx; St, stomach.

## Supplementary Figure 10

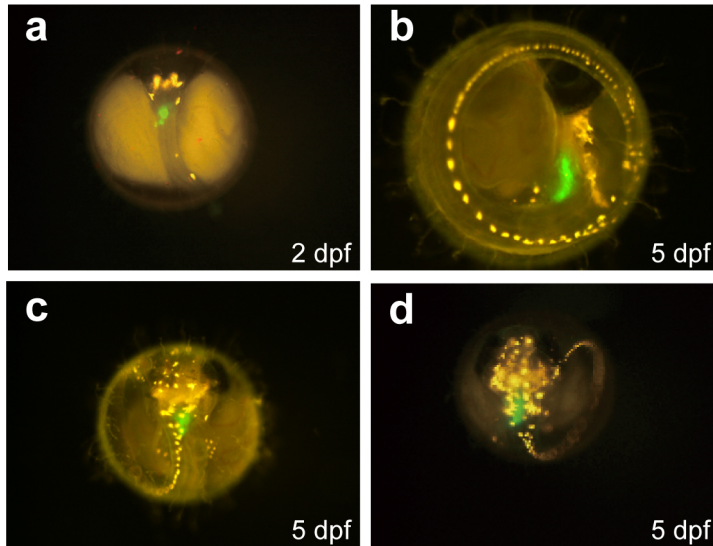

**Supplementary Fig. 10. The Fox-binding motif in Block-2 is dispensable for reporter expression in medaka embryos.** These images show the reporter expression driven by a Block-2 deletion construct that lacks nine bases (TGTGTTGAC) including the Fox-binding core (a red arrow in Supplementary Fig. 9e) in the four larvae at 2 or 5 dpf. The construct drove similar reporter expression to that driven by intact Block-2 (Figure 6h).

Supplementary Figure 11

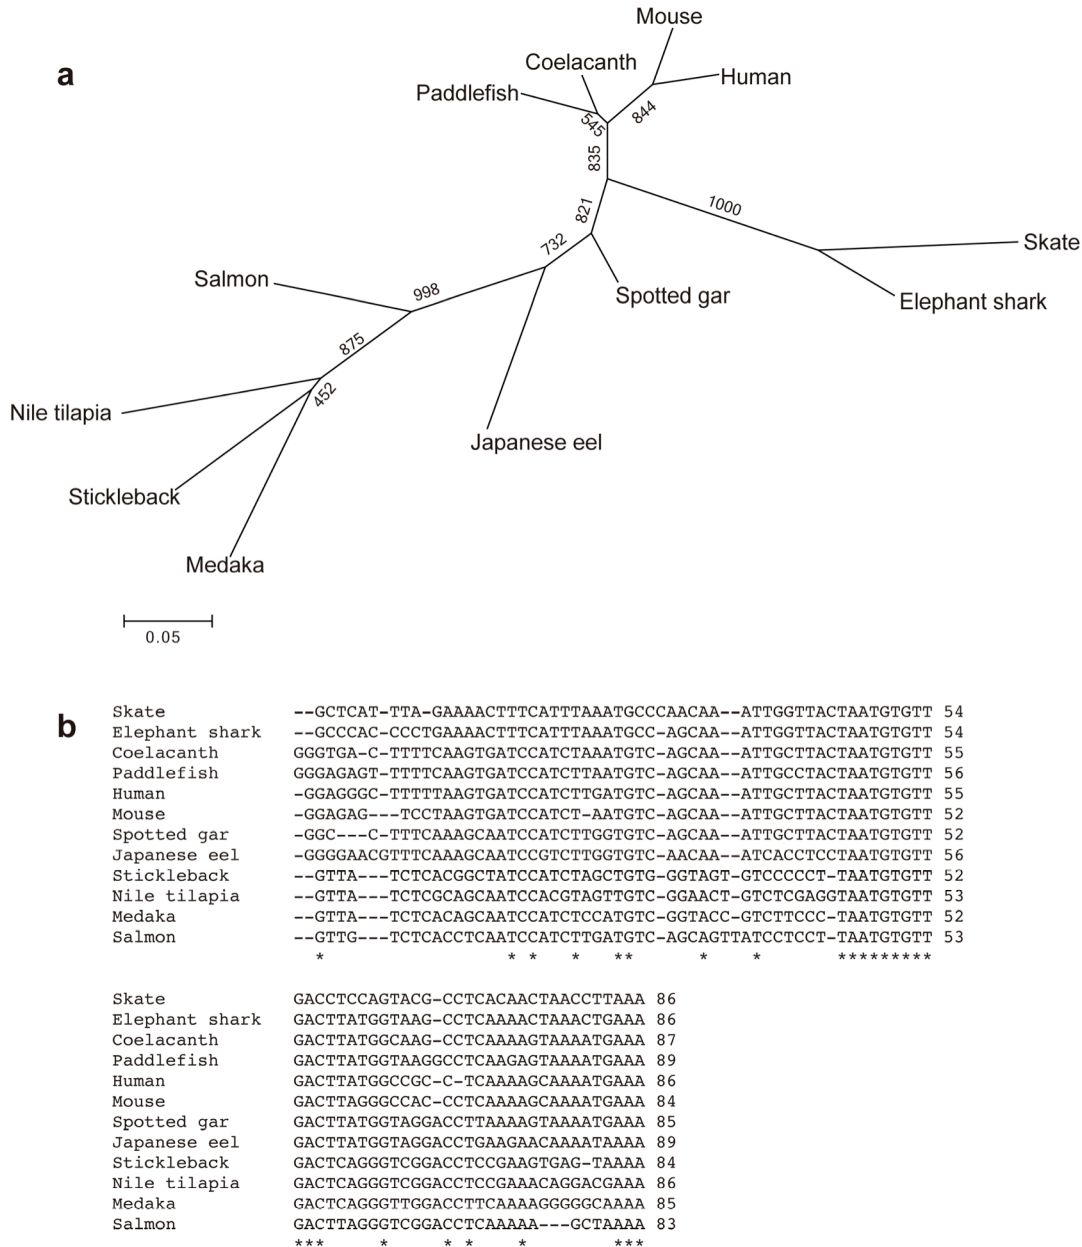

**Supplementary Fig. 11. Phylogenetic tree of Block-1 core sequences of diverse vertebrate taxa.** The tree was made using MEGA7.0.18 (a) on the basis of ~80bp core sequences of the Block-1 orthologues of 12 vertebrate species, which were aligned with ClutalW (DDBJ)(b).

**Supplementary Table 1. Viability of the MACS1<sup>-/-</sup> mutants**

| Age         | Wild type | MACS1 <sup>+/-</sup> | MACS1 <sup>-/-</sup> |
|-------------|-----------|----------------------|----------------------|
| E12.5       | 7*        | 19                   | 7                    |
| E18.5       | 8         | 14                   | 4                    |
| Newborn     | 19        | 24                   | 7                    |
| 2 days old  | 4         | 16                   | 0                    |
| 1 month old | 15        | 14                   | 0                    |

\*Numeral depicts the living animals at the stage.



**Supplementary Table 2. Defects in the MFCS4<sup>-/-</sup> and MACS1<sup>-/-</sup> at E18.5**

|                   | MFCS4 <sup>-/-</sup> | MACS1 <sup>-/-</sup> |
|-------------------|----------------------|----------------------|
| soft palate       | truncation           | normal               |
| hyoid bone        | hypoplasia           | relatively normal    |
| epiglottis        | truncation           | recognizable         |
| arytenoids        | minor truncation     | dysplasia            |
| vocal fold        | recognizable         | dysplasia            |
| thyroid cartilage | normal               | dysplasia            |
| cricoid cartilage | normal               | dysplasia            |
| trachea           | normal               | relatively normal    |

**Supplementary Table 3. Used primer pairs in this study**

| For ESC targeting of MACS1                   |                                 |                                  |
|----------------------------------------------|---------------------------------|----------------------------------|
|                                              | F                               | R                                |
| Long arm of targeting vector                 | TCTGCATGCATGAGCTGTAG            | TAGCTACATGTCCGCTAAGG             |
| Short arm of targeting vector                | GAGCACTCAGTCAATGTGTG            | GCATTCCAGACATGGTGTTT             |
| Southern blotting 5'probe                    | GACATCCTCGTGTGTCTTC             | CTTGAGAGTCACAAGGAAGG             |
| Southern blotting 3'probe                    | TATCTCATGCTCCCAGAAGG            | CCTTTGAGTCATCCATCCTC             |
| For detection of WT allele (p1, p2)          | AGAACAGGCACTCTAGATCC            | ATAACCAGGAGTCCAGGTAC             |
| For detection of MT allele (p3, p4)          | CTGCTGTCAAAGATGGGTAG            | ACTGCTCTTGCTCTCTAGAG             |
|                                              |                                 |                                  |
| For transgenic assay                         |                                 |                                  |
|                                              | F                               | R                                |
| 1264-bp including MACS1                      | AGAACAGGCACTCTAGATCC            | ATAACCAGGAGTCCAGGTAC             |
| c1                                           | AACTTTGCTAGCATCTGTCC            | ATAACCAGGAGTCCAGGTAC             |
| c2                                           | AGAACAGGCACTCTAGATCC            | CATCTGACGGATTGTTAGCC             |
| c3                                           | AGAACAGGCACTCTAGATCC            | GGCCACCCTCAAAAGCAAAA             |
| c4                                           | AGCCAGTGTACTGTTTTCAA            | AGCCAGTGTACTGTTTTCAA             |
| c5                                           | TTGTAAGTGGTGGTGCAGG             | TAGGTGAACTCTGTCTGCTC             |
| c6 (inverse PCR)                             | TTGTAAGTGGTGGTGCAGG             | ATAACCAGGAGTCCAGGTAC             |
| c7 (inverse PCR)                             | AGGGCCACCCTCAAAAGCAA            | GCTGACATTAGATGGATCAC             |
| c8 (inverse PCR)                             | TTAGGGCCACCCTCAAAAGC            | CATTAGTAAGCAATTTGCTG             |
| c9 (inverse PCR)                             | TGTTGACTTAGGGCCACCCT            | GCTGACATTAGATGGATCAC             |
| c10 (inverse PCR)                            | TAATGTGTTGACTTAGGGCC            | GCTGACATTAGATGGATCAC             |
| c11 (inverse PCR)                            | GTGGCCCTAAGTCGGCGCATT<br>AGTAAG | CTTACTAATGGGCCCGACTTA<br>GGGCCAC |
|                                              |                                 |                                  |
| Medaka whole                                 | GAGACGCAGGTTCTTTGAGG            | GTCGGACAAAGCTGTCATTC             |
| Medaka MACS1 (Block-1)                       | GGGACCAGTGTGAGAATGT             | GTCGGACAAAGCTGTCATTC             |
| Medaka Block-2                               | GAGACGCAGGTTCTTTGAGG            | GGTGGTATCAGACATGTTG              |
| Medaka $\Delta$ Block-2 core-1 (inverse PCR) | ATGAGAGCAGTCAGGGGTGT            | ACCATGTGCATG TTTAGGTC            |
| Medaka $\Delta$ Block-2 core-2 (inverse PCR) | CTGATGGTCAGACATTTGTC            | ATAACCAGAACTGCACTGG              |
| Coelacanth MACS1                             | GGGACCAGTGTGAGAATGT             | CCAACCAGGTGAACTTTGTC             |

|                      |                      |                      |
|----------------------|----------------------|----------------------|
| Skate MACS1          | GCCAGAGCATACAATGAAGG | CAAGTTGGTGGACATTGCTC |
| Elephant shark MACS1 | TGACCGTGCCTCATCTGAAA | TTTCAATCTCGCAAAGTTTT |
| Paddlefish MACS1     | AGCATGTAATCTCCTGTACG | TTGCTTGTGGCCAGATAGTG |
| Spotted gar MACS1    | TGCTTGCATCCGAAGACAAG | CAAATGGGTGCCAGTTAAGC |
| Spotted gar Block-2  | GTCCAAGCAGTAAAAGAAGG | GGAGACATTGATGATGAGCC |
| Japanese eel MACS1   | AAGCTGTCACTCAACTCCTG | CTGAGCTGAGCATGGTGATT |
| Japanese eel Block-2 | CCAGACCAGAGTGATTCATG | AATCACCATGCTCAGCTCAG |

**Supplementary Table 4. Genomic sequences used for VISTA plots**

|                 | Location of the sequence for VISTA analysis | Database                                                                                    |
|-----------------|---------------------------------------------|---------------------------------------------------------------------------------------------|
| Skate           | LC009631: 1-8,490                           | <a href="http://www.ddbj.nig.ac.jp/index-j.html">http://www.ddbj.nig.ac.jp/index-j.html</a> |
| Elephant shark  | chr KI636064: 496,375-498,997               | UCSC:Callorhinchus_milii-6.1.3/calMil1                                                      |
| Human           | chr7: 156,640,748-156,677,124               | UCSC: GRCh38/hg38                                                                           |
| Mouse           | chr5: 29,197,926-29,225,291                 | UCSC;GRCm38/mm10                                                                            |
| Coelacanth      | JH127332: 287,480-327,976                   | UCS: Broad/latCha1                                                                          |
| Paddlefish      | LC128331: 1-4,298                           | <a href="http://www.ddbj.nig.ac.jp/index-j.html">http://www.ddbj.nig.ac.jp/index-j.html</a> |
| Spotted gar     | LG9: 41,365,815-41,372,726                  | Ensembl; <a href="http://www.ensembl.org/index.html">http://www.ensembl.org/index.html</a>  |
| Golden arowana  | ASM16246v1 scaffold 53: 2,092,949-2,209,529 | Genbank: NW_017371970 GPS_014192443                                                         |
| Japanese eel    | AVPY00000000.1<br>KI307787: 59,997-72,360   | <a href="http://www.zfgenomics.com/sub/eel">http://www.zfgenomics.com/sub/eel</a>           |
| Atlantic salmon | chr ssa29: 9,829,141-9,839,046              | GenBank: XM_014180668.1, NC_027328                                                          |
| Medaka          | chr 2: 17,804,591 -17,816,721               | UCSC; NIG/UT MEDAKA1/oryLat2                                                                |
| Stickleback     | chrXXI: 9,044,862 -9,052,154                | UCSC; Broad/gasAcu1                                                                         |
| Nile tilapia    | chrLG9: 13,010,056 13,027,674               | UCSC; Broad oreNil1.1/oreNil2                                                               |
